# Supplementary material for: A Novel Reporter Rat Strain That Conditionally Expresses the Bright Red Fluorescent Protein tdTomato
Source: PubMed Central journal article supplement (PMC4873025; doi:10.1371/journal.pone.0155687), 2016-05-19
Supplement: pone.0155687.s002.pdf [file pone.0155687.s002.pdf]

## S2 Figure

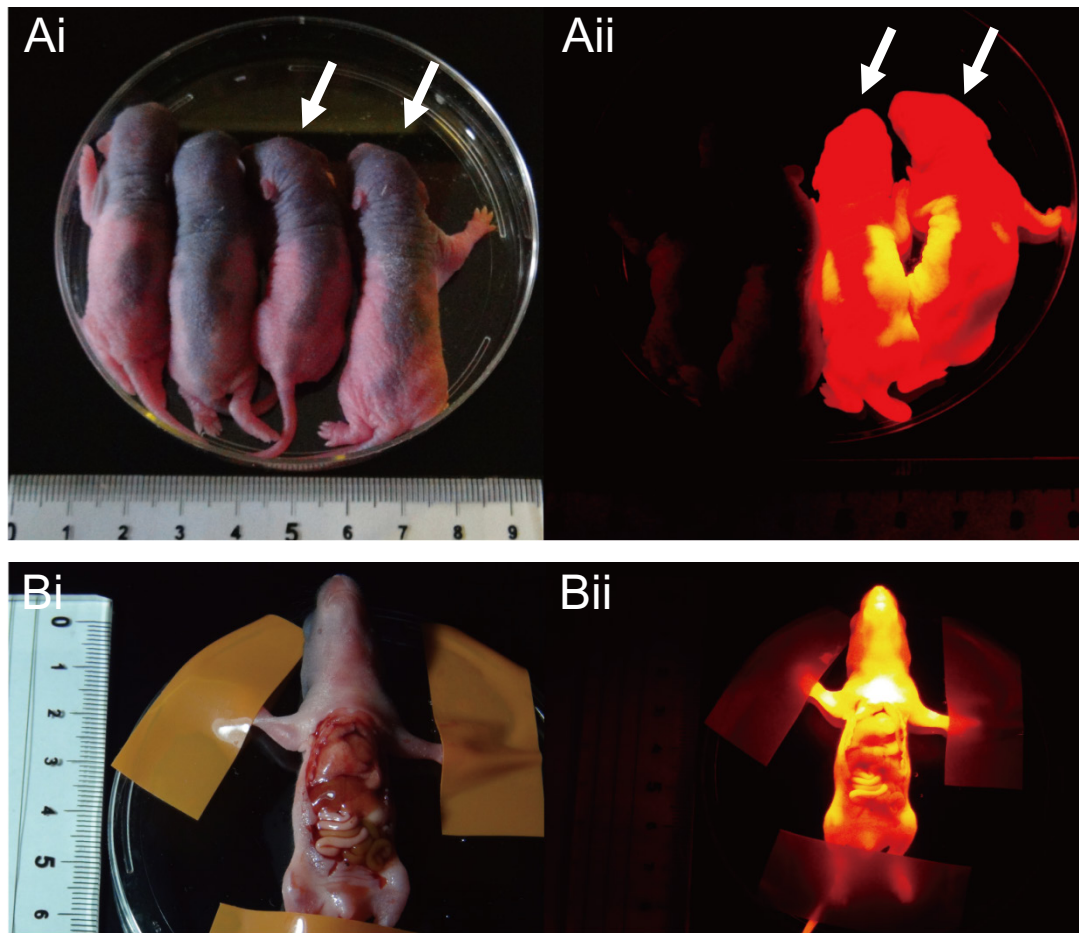

### S2 Fig. Generation of FLAME.

(A) P4 littermates obtained by crossing FLAME males with wild-type LE females: bright-field image (i) and fluorescent image (ii). Two of them (arrows) exhibited strong red fluorescence, whereas their siblings not. The scale is shown in (i). (B) Gross aspect of internal organs: bright-field image (i) and fluorescent image (ii). The scale is shown in (i).
